# Supplementary material
Source: PubMed Central journal article supplement (PMC6277207)
Supplement: NIHMS985583-supplement-Figure_E2.pdf [file NIHMS985583-supplement-Figure_E2.pdf]

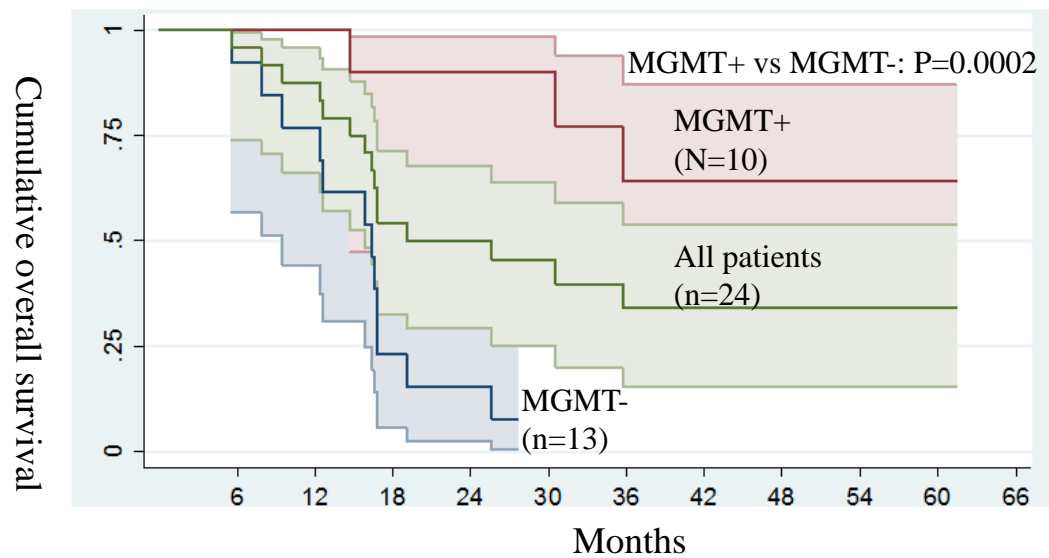

Figure E2. Median overall survival curves with 95% confidence intervals for all patients and for patients with positive and negative MGMT methylation status.

MGMT+: methylated MGMT; MGMT-: unmethylated MGMT
